# Supplementary material for: Oxidative capacity and radical chemistry in the polluted atmosphere of Hong Kong and Pearl River Delta region: analysis of a severe photochemical smog episode
Source: Copernicus journal article supplement (doi:10.5194/acp-2016-120), 2016-02-15
Supplement: Supplementary file 1 [file acp-2016-120-supplement.pdf]

Supplementary materials of

**Oxidative capacity and radical chemistry in the polluted atmosphere of Hong Kong and Pearl River Delta region: analysis of a severe photochemical smog episode**

Likun Xue<sup>1\*</sup>, Rongrong Gu<sup>1</sup>, Tao Wang<sup>2,1</sup>, Xinfeng Wang<sup>1</sup>, Sandra Saunders<sup>3</sup>, Donald Blake<sup>4</sup>, Peter K. K. Louie<sup>5</sup>, Connie W. Y. Luk<sup>5</sup>, Isobel Simpson<sup>4</sup>, Zheng Xu<sup>1</sup>, Zhe Wang<sup>2</sup>, Yuan Gao<sup>2</sup>, Shuncheng Lee<sup>2</sup>, Abdelwahid Mellouki<sup>1</sup>, and Wenxing Wang<sup>1</sup>

<sup>1</sup> Environment Research Institute, Shandong University, Ji'nan, Shandong, China

<sup>2</sup> Department of Civil and Environmental Engineering, Hong Kong Polytechnic University, Hong Kong, China

<sup>3</sup> School of Chemistry and Biochemistry, University of Western Australia, WA, Australia

<sup>4</sup> Department of Chemistry, University of California at Irvine, Irvine, CA, USA

<sup>5</sup> Environmental Protection Department, the Government of Hong Kong Special Administrative Region, Hong Kong, China

*\*To whom correspondence should be addressed*

*E-mail: [xuelikun@sdu.edu.cn](mailto:xuelikun@sdu.edu.cn), Tel: +86-531-8836 1185*

|        |                          |
|--------|--------------------------|
| Page 2 | <i>Table S1</i>          |
| Page 3 | <i>Figure S1</i>         |
| Page 4 | <i>Figure S2</i>         |
| Page 5 | <i>Figures S3 and S4</i> |
| Page 6 | <i>Figure S5</i>         |
| Page 7 | <i>Figure S6</i>         |

**Table S1.** Summary of field measurements at Tung Chung in summer 2011

| <b>Species</b>                                                                                                                                                                              | <b>Instrument or techniques</b>                              | <b>Time resolution</b>                   |
|---------------------------------------------------------------------------------------------------------------------------------------------------------------------------------------------|--------------------------------------------------------------|------------------------------------------|
| O <sub>3</sub>                                                                                                                                                                              | <i>TEI 49i</i>                                               | 1 min                                    |
| CO                                                                                                                                                                                          | <i>API 300EU</i>                                             | 1 min                                    |
| SO <sub>2</sub>                                                                                                                                                                             | <i>TEI 43i</i>                                               | 1 min                                    |
| NO & NO <sub>2</sub>                                                                                                                                                                        | <i>TEI 42i + blue light converter</i>                        | 1 min                                    |
| NO & NO <sub>y</sub>                                                                                                                                                                        | <i>TEI 42cy + MoO converter</i>                              | 1 min                                    |
| HONO                                                                                                                                                                                        | <i>LOPAP</i>                                                 | 1 min                                    |
| CINO <sub>2</sub>                                                                                                                                                                           | <i>CIMS</i>                                                  | 6 sec                                    |
| PANs                                                                                                                                                                                        | <i>CIMS</i>                                                  | 6 sec                                    |
| H <sub>2</sub> O <sub>2</sub> & organic peroxides                                                                                                                                           | <i>Aerolaser AL-2021</i>                                     | 1 min                                    |
| C <sub>1</sub> -C <sub>10</sub> hydrocarbons                                                                                                                                                | <i>Canister + GC/FID/ECD/MS</i>                              | 24-hour                                  |
| C <sub>2</sub> -C <sub>10</sub> hydrocarbons                                                                                                                                                | <i>Syntech Spectras, model GC955<br/>Series 600/800 POCP</i> | 30 min                                   |
| C <sub>1</sub> -C <sub>8</sub> carbonyls                                                                                                                                                    | <i>DNPH-coated sorbent cartridge<br/>sampling + HPLC</i>     | 24-hour in general;<br>3-hour on episode |
| PM <sub>2.5</sub> & PM <sub>10</sub> mass                                                                                                                                                   | <i>SHARP</i>                                                 | 1 min                                    |
| SO <sub>4</sub> <sup>2-</sup> , NO <sub>3</sub> <sup>-</sup> , NH <sub>4</sub> <sup>+</sup> , Cl <sup>-</sup> , Na <sup>+</sup> , Ca <sup>2+</sup> ,<br>K <sup>+</sup> in PM <sub>2.5</sub> | <i>MARGA</i>                                                 | 1 hour                                   |
| OC & EC in PM <sub>2.5</sub>                                                                                                                                                                | <i>Sunset OCEC analyzer</i>                                  | 1 hour                                   |
| BC in PM <sub>2.5</sub>                                                                                                                                                                     | <i>Magee</i>                                                 | 5 min                                    |
| Aerosol scattering coefficient                                                                                                                                                              | <i>Ecotech Nephelometer</i>                                  | 1 min                                    |
| Particle number concentration<br>(5 nm-10 μm)                                                                                                                                               | <i>MSP/WPS Model 1000XP</i>                                  | 8 min                                    |
| <i>J</i> <sub>NO2</sub>                                                                                                                                                                     | <i>Metcon Filter Radiometer</i>                              | 5 sec                                    |
| Temperature & RH                                                                                                                                                                            | <i>Young RH/T probe</i>                                      | 5 sec                                    |
| Wind speed and direction                                                                                                                                                                    | <i>Gill WindSonic</i>                                        | 5 sec                                    |
| Solar Radiation                                                                                                                                                                             | <i>LI-200 Pyranometer Sensor</i>                             | 5 sec                                    |

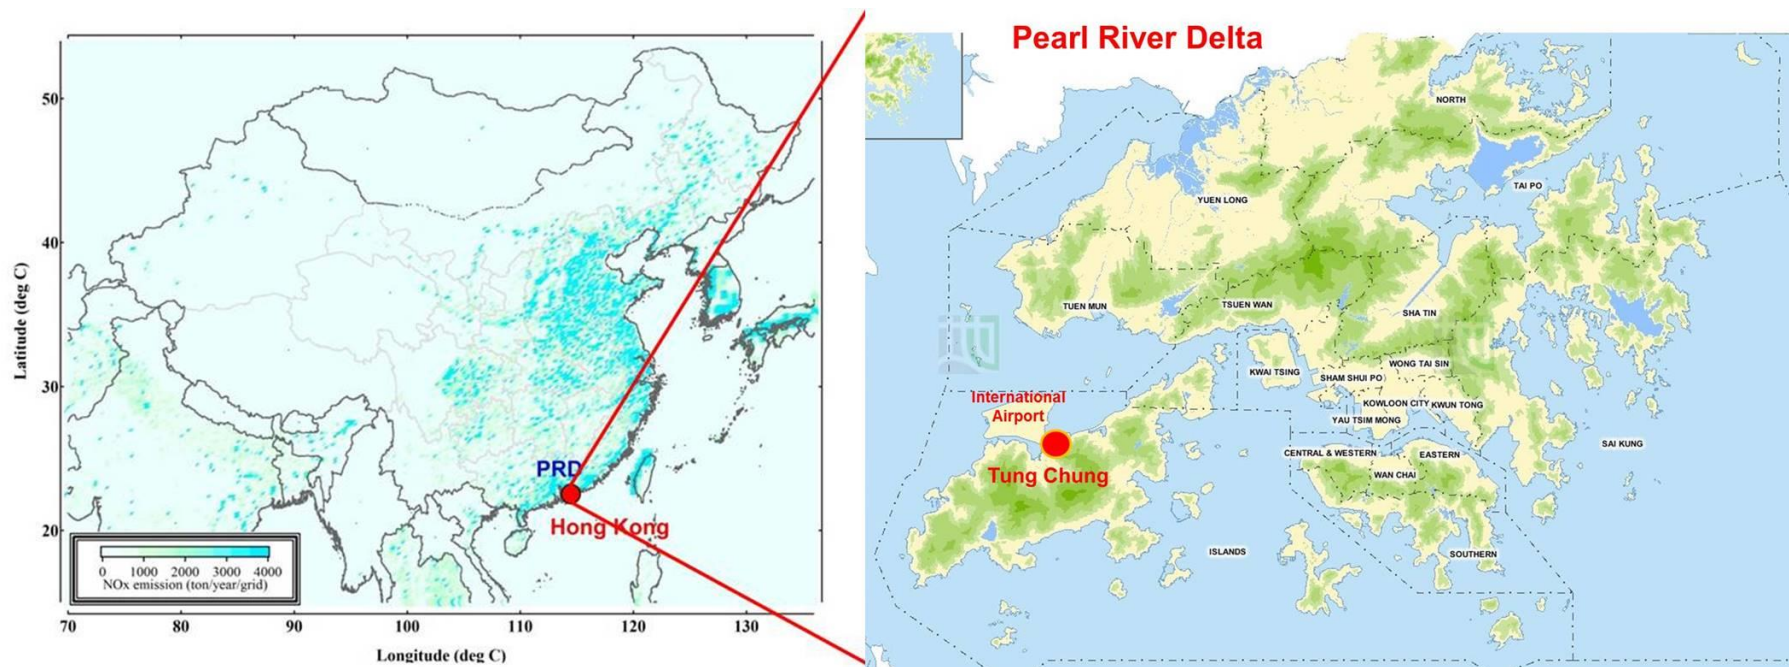

**Figure S1.** Map showing the locations of Hong Kong, the Pearl River Delta region and the study site at Tung Chung (TC).

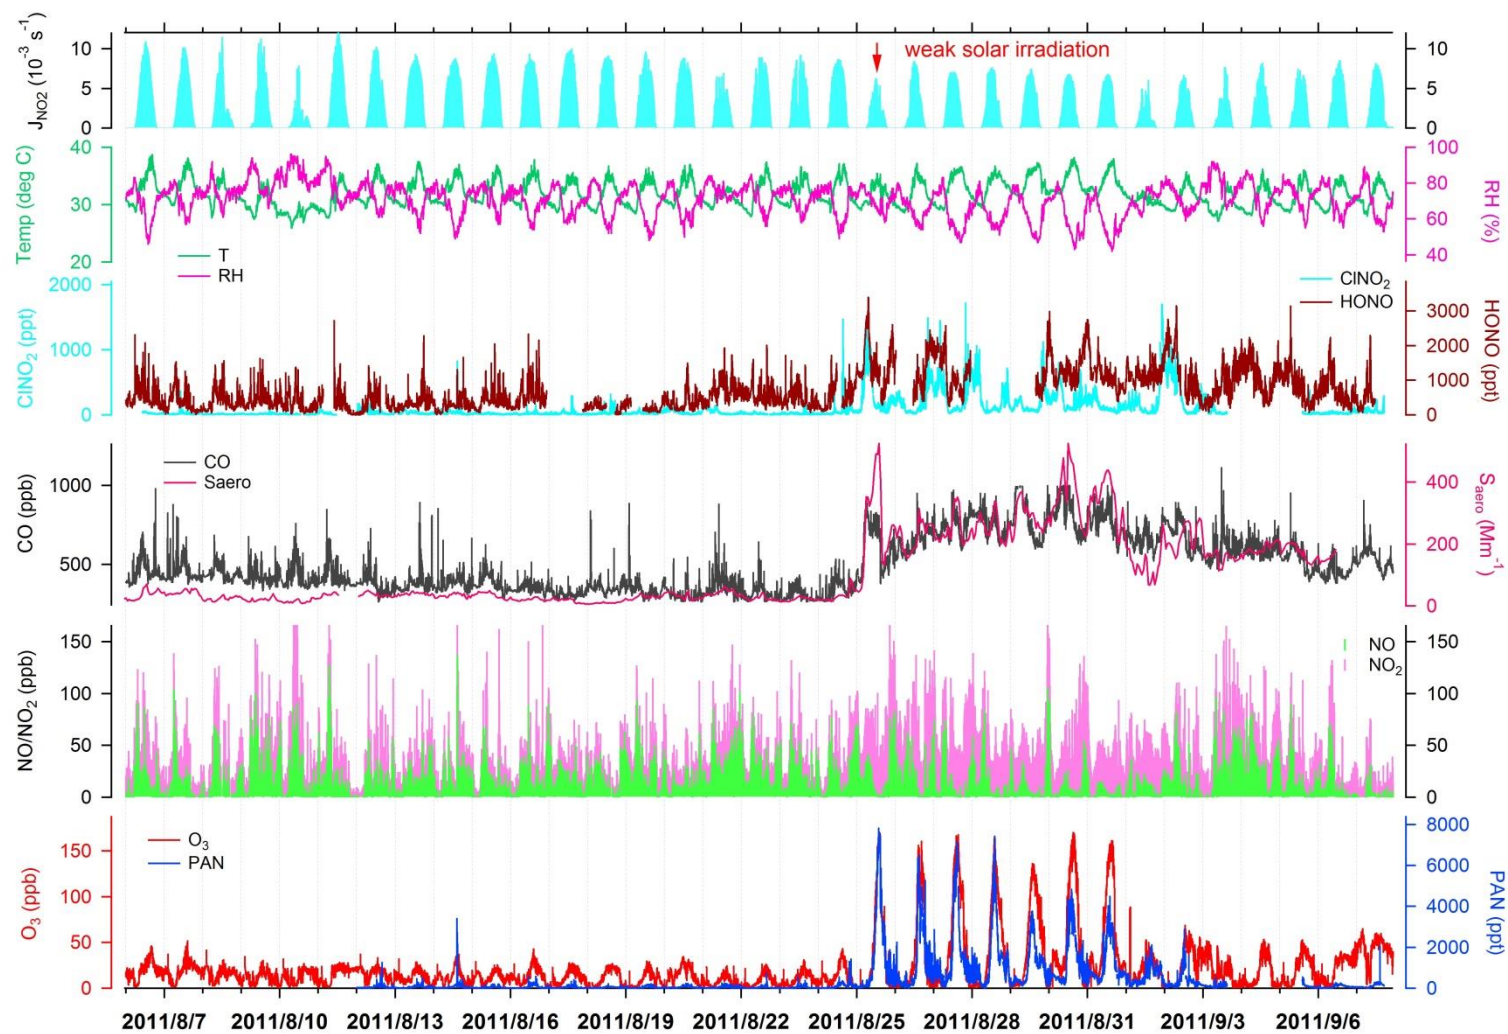

**Figure S2.** Time series of air pollutants and meteorological parameters observed at Tung Chung during the intensive campaign from 6 August to 7 September 2011.  $S_{aero}$  stands for the aerosol scattering coefficient of  $PM_{2.5}$ .

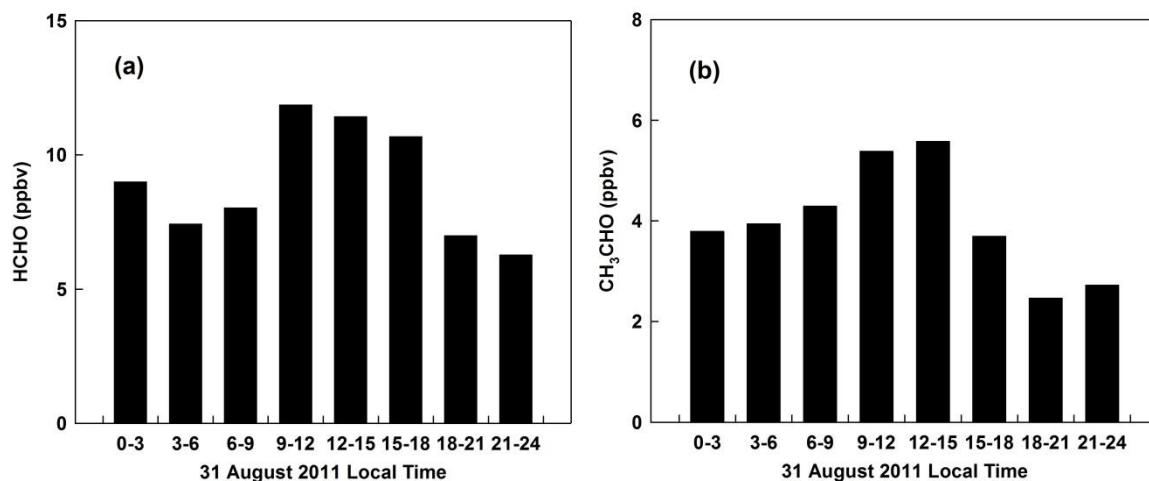

**Figure S3.** Diurnal variations of (a) formaldehyde and (b) acetaldehyde measured at Tung Chung on 31 August 2011.

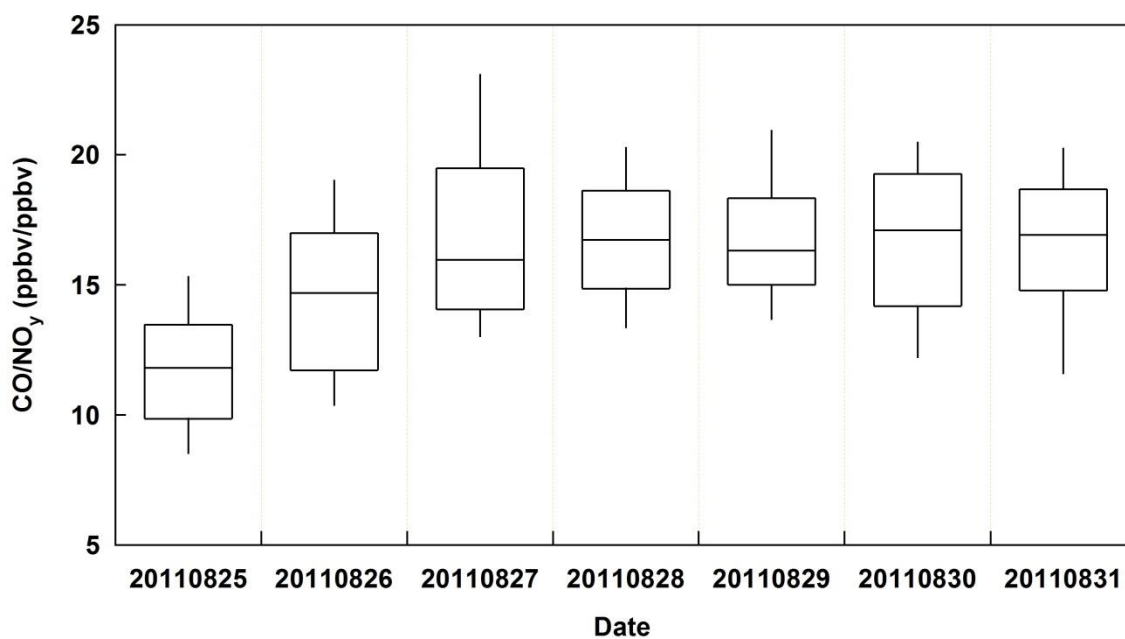

**Figure S4.** Distributions of the daytime (08:00–18:00 local time) CO/NO<sub>y</sub> ratios measured at Tung Chung from 25–31 August 2011. The whisker plot provides the 90<sup>th</sup>, 75<sup>th</sup>, 50<sup>th</sup>, 25<sup>th</sup> and 10<sup>th</sup> percentiles of the measurement data.

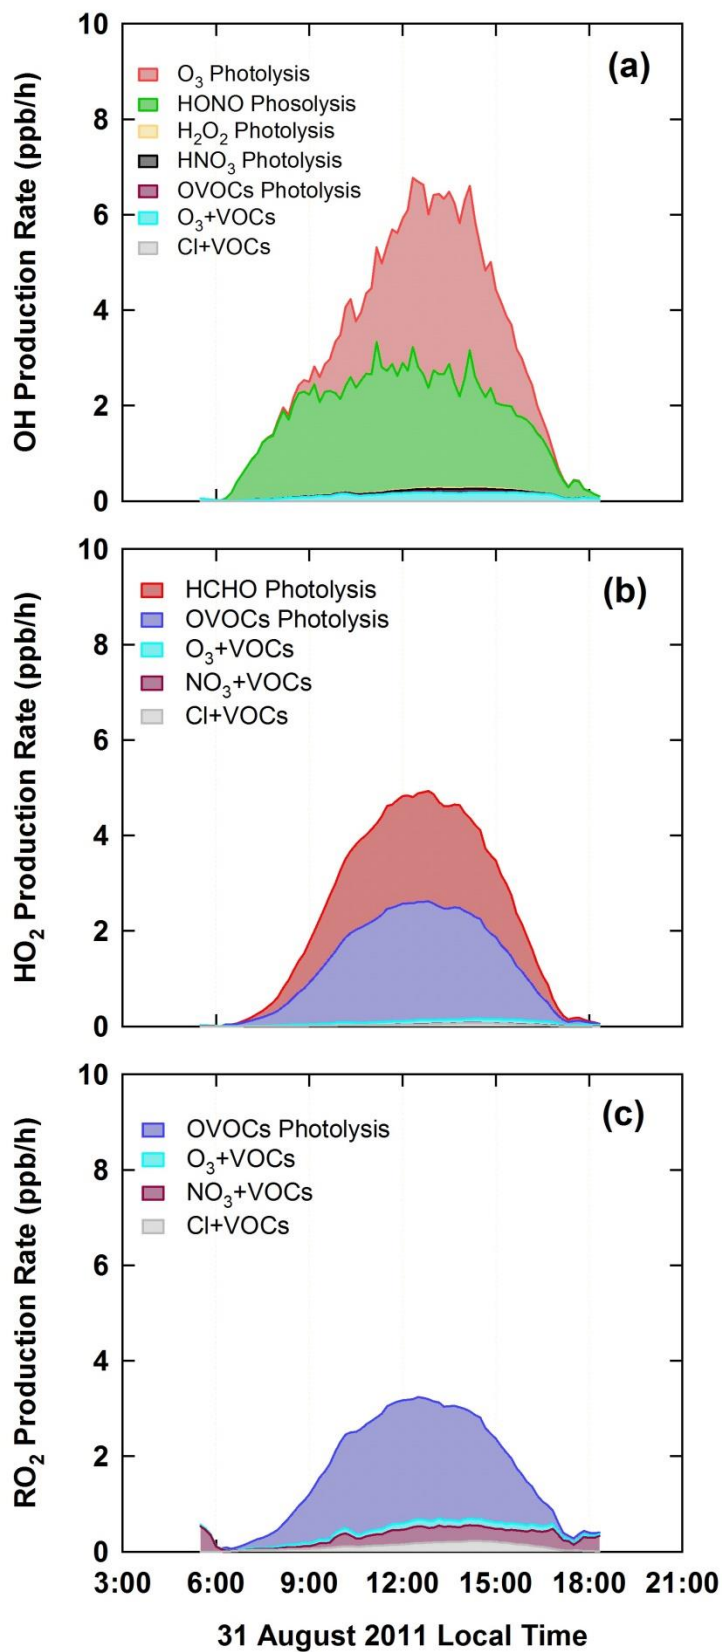

**Figure S5.** Primary daytime sources of (a) OH, (b) HO<sub>2</sub> and (c) RO<sub>2</sub> radicals at Tung Chung on 31 August 2011.

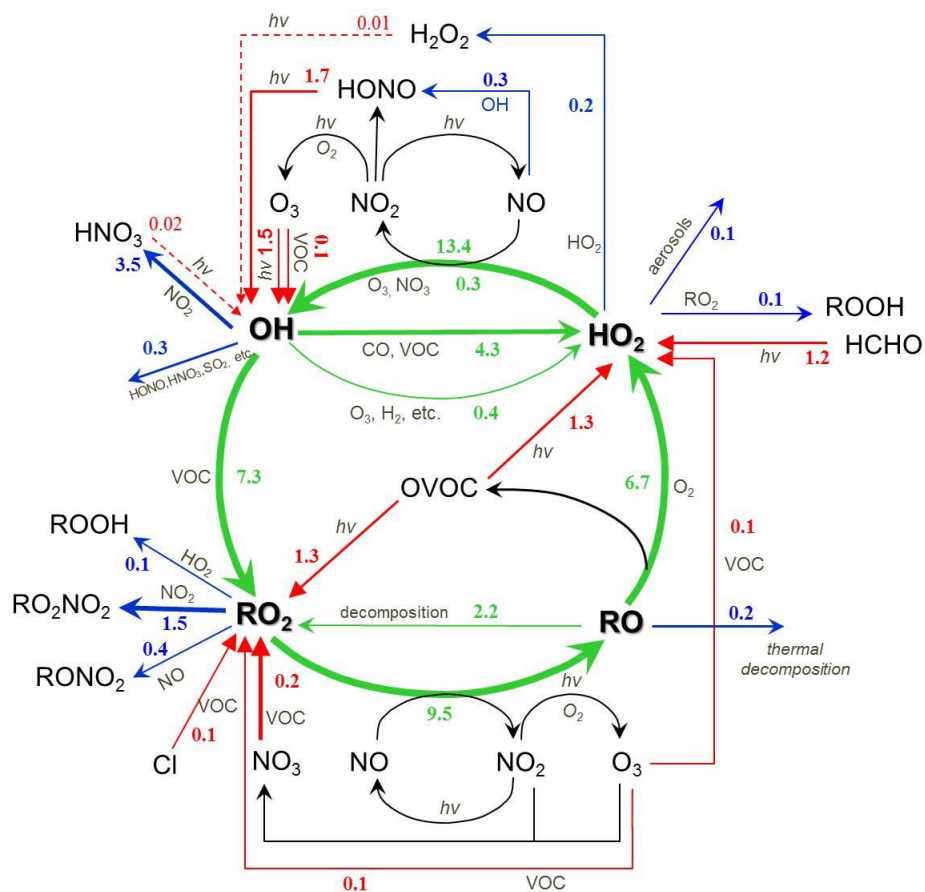

**Figure S6.** Daytime average RO<sub>x</sub> budget at Tung Chung on 31 August 2011. The units are ppb/h. The red, blue and green lines indicate the production, destruction and recycling pathways of radicals, respectively.
